# Supplementary material for: Population structure and associated phenotypes of Salmonella enterica serovars Derby and Mbandaka overlap with host range
Source: PubMed Central journal article supplement (PMC4743429; doi:10.1186/s12866-016-0628-4), 2016-02-04
Supplement: 12866_2016_628_MOESM1_ESM.pdf [file 12866_2016_628_MOESM1_ESM.pdf]

| Strain identifier | Serovar  | Isolate number | Year | Host    |
|-------------------|----------|----------------|------|---------|
| D1                | Derby    | 4052-08        | 2008 | Pig     |
| D2                | Derby    | 4166-08        | 2008 | Pig     |
| D3                | Derby    | 1300-00        | 2000 | Pig     |
| D4                | Derby    | 7725-00        | 2000 | Turkey  |
| D5                | Derby    | 523-02         | 2002 | Pig     |
| D6                | Derby    | 8278-02        | 2002 | Turkey  |
| D7                | Derby    | 1728-04        | 2004 | Pig     |
| D8                | Derby    | 3380-04        | 2004 | Turkey  |
| D9                | Derby    | 6479-06        | 2006 | Pig     |
| D10               | Derby    | 8292-06        | 2006 | Turkey  |
| D11               | Derby    | 1617-08        | 2008 | Pig     |
| D12               | Derby    | 5440-08        | 2008 | Turkey  |
| D13               | Derby    | L0296-10       | 2010 | Pig     |
| D14               | Derby    | 3315-10        | 2010 | Turkey  |
| M1                | Mbandaka | 3611-08        | 2008 | Cattle  |
| M2                | Mbandaka | 5431-09        | 2009 | Cattle  |
| M3                | Mbandaka | 1045-00        | 2000 | Cattle  |
| M4                | Mbandaka | 8768-00        | 2000 | Chicken |
| M5                | Mbandaka | 3161-02        | 2002 | Chicken |
| M6                | Mbandaka | 8766-02        | 2002 | Chicken |
| M7                | Mbandaka | 727-04         | 2004 | Cattle  |
| M8                | Mbandaka | 1223-04        | 2004 | Chicken |
| M9                | Mbandaka | 243-06         | 2006 | Chicken |
| M10               | Mbandaka | 1789-06        | 2006 | Cattle  |
| M11               | Mbandaka | 1331-08        | 2008 | Cattle  |
| M12               | Mbandaka | 4826-08        | 2008 | Chicken |
| M13               | Mbandaka | 1015-10        | 2010 | Cattle  |
| M14               | Mbandaka | 2826-10        | 2010 | Chicken |
