# Supplementary material for: Population structure and associated phenotypes of Salmonella enterica serovars Derby and Mbandaka overlap with host range
Source: PubMed Central journal article supplement (PMC4743429; doi:10.1186/s12866-016-0628-4), 2016-02-04
Supplement: 12866_2016_628_MOESM2_ESM.pdf [file 12866_2016_628_MOESM2_ESM.pdf]

| Primer Name | Sequence             | Amplicon Length | Sequence of origin | Start position |
|-------------|----------------------|-----------------|--------------------|----------------|
| SPI1_G1_F   | ctgccagcaggtgaactatt | 534             | M1                 | 2935546        |
| SPI1_G1_R   | aaagcttcatgcaggtcatc |                 |                    | 2936080        |
| SPI1_G2_F   | tcttcggccatatgattggt | 637             | M1                 | 2939573        |
| SPI1_G2_R   | acatgcctgtggagttcaat |                 |                    | 2940210        |
| gooN_F      | atgtcttcccggatataggc | 517             | D1                 | 2027994        |
| gooN_R      | ctggcggatctctttcagta |                 |                    | 2028511        |
| potR_F      | gacattacggcatcaggaac | 684             | D1                 | 2032269        |
| potR_R      | gcattagctccacagcattt |                 |                    | 2031585        |
| talN_F      | acgtcagcatccagctttac | 224             | D1                 | 2033380        |
| talN_R      | cgcaatcttcacacactctg |                 |                    | 2033156        |
| chlE_F      | ccacaaacaaccgaacagat | 218             | D1                 | 2039475        |
| chlE_R      | gaacacatatttcggcatca |                 |                    | 2039693        |
| bigM_F      | gctgctcacaatcttctgt  | 375             | D1                 | 2048635        |
| bigM_R      | ccgctaataatgggttgatg |                 |                    | 2048260        |
| genE_F      | cgcagtaaaacaggctcaat | 374             | D1                 | 2050357        |
| genE_R      | tcagatcctgacgtggagtt |                 |                    | 2049983        |
| tinY_F      | atgcgagcttttaactca   | 226             | D1                 | 2062654        |
| tinY_R      | ctctgccagaacggtgtagt |                 |                    | 2062428        |
| docB_F      | cactccaccgaaagaagaaa | 282             | D1                 | 2065588        |
| docB_R      | attagacgccagcttgtcac |                 |                    | 2065870        |
